# Supplementary material for: miR-126 in Extracellular Vesicles Derived from Hepatoblastoma Cells Promotes the Tumorigenesis of Hepatoblastoma through Inducing the Differentiation of BMSCs into Cancer Stem Cells
Source: Hindawi journal article supplement (doi:10.1155/2021/6744715), 2021-10-29

**A****Differentially Expressed miRNA of GSE153089**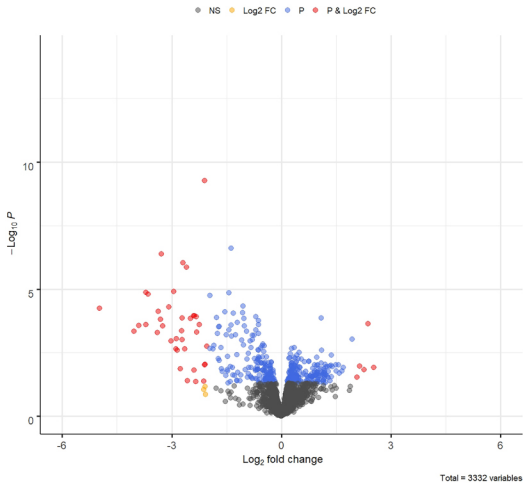**B****Differentially Expressed miRNA of GSE75283**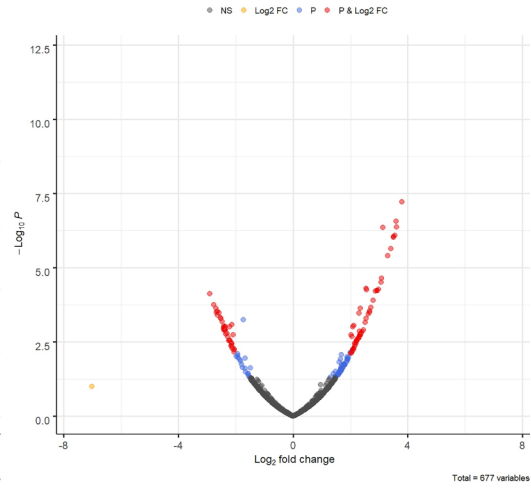**C**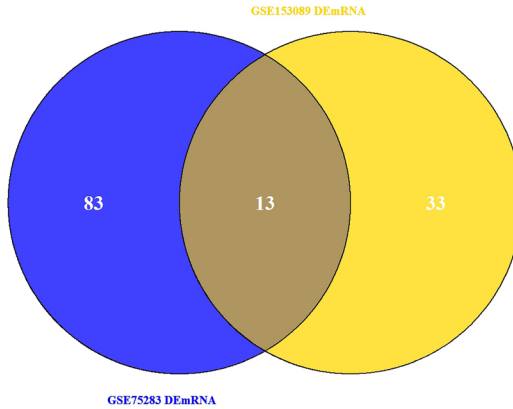

Supplement: f1 [file 6744715.f1.pdf]
